# Supplementary material for: Homochiral Cu6Dy3 single-molecule magnets displaying proton conduction and a strong magneto-optical Faraday effect
Source: Royal Society of Chemistry journal article supplement (doi:10.1039/d3qi00634d), 2023-01-01
Supplement: d3qi00634d1.pdf [file d3qi00634d1.pdf]

Supporting Information

**Homochiral  $\text{Cu}_6\text{Dy}_3$  single-molecule magnets displaying  
proton conduction and strong magneto-optical Faraday effect**

Cai-Ming Liu,<sup>1\*</sup> Shui-Dong Zhu,<sup>2</sup> Ying-Bing Lu,<sup>2</sup> Xiang Hao,<sup>2</sup> He-Rui Wen<sup>3</sup>

*<sup>1</sup>Beijing National Laboratory for Molecular Sciences, CAS Key Laboratory for Organic Solids, Institute of Chemistry, Chinese Academy of Sciences, Beijing 100190, China*

*<sup>2</sup>Jiangxi Key Laboratory of Function of Materials Chemistry, College of Chemistry and Chemical Engineering, Gannan Normal University, Ganzhou 341000, Jiangxi Province, China*

*<sup>3</sup>School of Metallurgy and Chemical Engineering, Jiangxi University of Science and Technology, Ganzhou 341000, Jiangxi Province, China*

## Table of Contents

|                                                                                                                          |     |
|--------------------------------------------------------------------------------------------------------------------------|-----|
| <b>Table S1.</b> Selected bond lengths (Å) and angles (°) of <i>R-1</i> and <i>S-1</i> .                                 | S3  |
| <b>Table S2.</b> Continuous Shape Measures calculation for the Dy1 atom in <i>R-1</i> .                                  | S4  |
| <b>Table S3.</b> Continuous Shape Measures calculation for the Dy2 atom in <i>R-1</i> .                                  | S5  |
| <b>Table S4.</b> Continuous Shape Measures calculation for the Dy3 atom in <i>R-1</i> .                                  | S5  |
| <b>Fig. S1.</b> Unit cell diagram of <i>R-1</i> .                                                                        | S6  |
| <b>Fig. S2.</b> Crystal structure of <i>S-1</i> , all H atoms and solvent molecules are omitted for clarity.             | S6  |
| <b>Table S5.</b> Continuous Shape Measures calculation for the Dy1 atom in <i>S-1</i> .                                  | S7  |
| <b>Table S6.</b> Continuous Shape Measures calculation for the Dy2 atom in <i>S-1</i> .                                  | S7  |
| <b>Table S7.</b> Continuous Shape Measures calculation for the Dy3 atom in <i>S-1</i> .                                  | S8  |
| <b>Fig. S3.</b> Unit cell diagram of <i>S-1</i> .                                                                        | S8  |
| <b>Fig. S4.</b> <i>M</i> versus <i>H/T</i> plots at 2-6 K of <i>R-1</i> .                                                | S9  |
| <b>Fig. S5.</b> <i>M</i> versus <i>H/T</i> plots at 2-6 K of <i>S-1</i> .                                                | S9  |
| <b>Fig. S6.</b> Hysteresis loop for <i>R-1</i> at 1.9 K.                                                                 | S10 |
| <b>Fig. S7.</b> Plots of ac magnetic susceptibility for <i>S-1</i> .                                                     | S10 |
| <b>Fig. S8.</b> Hysteresis loop for <i>S-1</i> at 1.9 K.                                                                 | S11 |
| <b>Fig. S9.</b> MCD spectra of <i>R-1</i> and <i>S-1</i> .                                                               | S11 |
| <b>Table S8.</b> The proton conductivity of <i>R-1</i> at 25 °C under variable relative humidity (RH).                   | S12 |
| <b>Table S9.</b> The proton conductivity of <i>R-1</i> at 100 % relative humidity (RH) under variable temperature (°C).  | S12 |
| <b>Fig. S10.</b> Plots of proton conductivity for <i>S-1</i> .                                                           | S13 |
| <b>Table S10.</b> The proton conductivity of <i>S-1</i> at 25 °C under variable relative humidity (RH).                  | S14 |
| <b>Table S11.</b> The proton conductivity of <i>S-1</i> at 100 % relative humidity (RH) under variable temperature (°C). | S14 |

**Table S1.** Selected bond lengths (Å) and angles (°) of *R-1* and *S-1*.

| <i>R-1</i>  |          |            |          |
|-------------|----------|------------|----------|
| Dy1-O1W     | 2.350(5) | Dy1-O2     | 2.380(5) |
| Dy1-O2W     | 2.355(5) | Dy1-O6     | 2.362(5) |
| Dy1-O11     | 2.404(4) | Dy1-O12    | 2.366(4) |
| Dy1-O13     | 2.376(5) | Dy1-O14    | 2.408(5) |
| Dy2-O3W     | 2.361(5) | Dy2-O4W    | 2.353(5) |
| Dy2-O8      | 2.348(5) | Dy2-O10    | 2.372(5) |
| Dy2-O13     | 2.386(5) | Dy2-O14    | 2.387(5) |
| Dy2-O15     | 2.381(5) | Dy2-O16    | 2.395(4) |
| Dy3-O4      | 2.341(5) | Dy3-O5W    | 2.347(5) |
| Dy3-O6W     | 2.372(5) | Dy3-O11    | 2.378(5) |
| Dy3-O12     | 2.411(4) | Dy3-O15    | 2.414(5) |
| Dy3-O16     | 2.367(5) | Dy3-O30    | 2.365(5) |
| Cu1-O1      | 1.898(5) | Cu1-O2     | 1.942(5) |
| Cu1-O11     | 1.934(5) | Cu1-N1     | 1.904(6) |
| Cu2-O3      | 1.892(5) | Cu2-O4     | 1.956(5) |
| Cu2-O12     | 1.950(5) | Cu2-N2     | 1.914(6) |
| Cu3-O7      | 1.896(5) | Cu3-O8     | 1.936(5) |
| Cu3-O13     | 1.956(5) | Cu3-N3     | 1.907(6) |
| Cu4-O5      | 1.903(5) | Cu4-O6     | 1.944(5) |
| Cu4-O14     | 1.953(4) | Cu4-N4     | 1.926(6) |
| Cu5-O15     | 1.948(5) | Cu5-O29    | 1.900(5) |
| Cu5-O30     | 1.958(5) | Cu5-N5     | 1.911(6) |
| Cu6-O9      | 1.901(5) | Cu6-O10    | 1.950(5) |
| Cu6-O16     | 1.942(5) | Cu6-N6     | 1.912(6) |
| O1-Cu1-O2   | 172.8(2) | N1-Cu1-O11 | 172.9(2) |
| O3-Cu2-O4   | 178.3(2) | N2-Cu2-O12 | 169.3(2) |
| O7-Cu3-O8   | 178.8(2) | N3-Cu3-O13 | 167.5(3) |
| O5-Cu4-O6   | 177.4(2) | N4-Cu4-O14 | 169.1(2) |
| O29-Cu5-O30 | 176.9(2) | N5-Cu5-O15 | 168.4(2) |
| O9-Cu6-O10  | 171.1(2) | N6-Cu6-O16 | 173.0(2) |
| <i>S-1</i>  |          |            |          |
| Dy1-O1W     | 2.352(4) | Dy1-O2     | 2.377(4) |
| Dy1-O2W     | 2.366(4) | Dy1-O6     | 2.354(4) |
| Dy1-O11     | 2.398(4) | Dy1-O12    | 2.380(4) |
| Dy1-O13     | 2.380(4) | Dy1-O14    | 2.414(4) |
| Dy2-O3W     | 2.362(5) | Dy2-O4W    | 2.358(5) |
| Dy2-O8      | 2.350(4) | Dy2-O10    | 2.370(4) |
| Dy2-O13     | 2.402(4) | Dy2-O14    | 2.390(4) |
| Dy2-O15     | 2.384(4) | Dy2-O16    | 2.401(4) |
| Dy3-O4      | 2.347(4) | Dy3-O5W    | 2.360(4) |
| Dy3-O6W     | 2.379(4) | Dy3-O11    | 2.371(4) |

|             |          |            |          |
|-------------|----------|------------|----------|
| Dy3-O12     | 2.418(4) | Dy3-O15    | 2.415(4) |
| Dy3-O16     | 2.368(4) | Dy3-O30    | 2.363(4) |
| Cu1-O1      | 1.898(5) | Cu1-O2     | 1.951(4) |
| Cu1-O11     | 1.946(4) | Cu1-N1     | 1.909(5) |
| Cu2-O3      | 1.898(4) | Cu2-O4     | 1.964(4) |
| Cu2-O12     | 1.953(4) | Cu2-N2     | 1.923(5) |
| Cu3-O7      | 1.906(5) | Cu3-O8     | 1.957(5) |
| Cu3-O13     | 1.956(4) | Cu3-N3     | 1.917(5) |
| Cu4-O5      | 1.901(5) | Cu4-O6     | 1.950(5) |
| Cu4-O14     | 1.953(4) | Cu4-N4     | 1.923(5) |
| Cu5-O15     | 1.951(4) | Cu5-O29    | 1.906(5) |
| Cu5-O30     | 1.962(4) | Cu5-N5     | 1.905(5) |
| Cu6-O9      | 1.903(4) | Cu6-O10    | 1.956(4) |
| Cu6-O16     | 1.949(4) | Cu6-N6     | 1.918(5) |
| O1-Cu1-O2   | 172.6(2) | N1-Cu1-O11 | 173.4(2) |
| O3-Cu2-O4   | 178.4(2) | N2-Cu2-O12 | 170.1(2) |
| O7-Cu3-O8   | 179.5(2) | N3-Cu3-O13 | 168.1(2) |
| O5-Cu4-O6   | 177.1(2) | N4-Cu4-O14 | 169.0(2) |
| O29-Cu5-O30 | 176.7(2) | N5-Cu5-O15 | 168.1(2) |
| O9-Cu6-O10  | 171.4(2) | N6-Cu6-O16 | 172.8(2) |

**Table S2.** Continuous Shape Measures calculation for the Dy1 atom in *R-1*.  
Dy structures

|          |        |                                            |
|----------|--------|--------------------------------------------|
| OP-8     | 1 D8h  | Octagon                                    |
| HPY-8    | 2 C7v  | Heptagonal pyramid                         |
| HBPY-8   | 3 D6h  | Hexagonal bipyramid                        |
| CU-8     | 4 Oh   | Cube                                       |
| SAPR-8   | 5 D4d  | Square antiprism                           |
| TDD-8    | 6 D2d  | Triangular dodecahedron                    |
| JGBF-8   | 7 D2d  | Johnson gyrobifastigium J26                |
| JETBPY-8 | 8 D3h  | Johnson elongated triangular bipyramid J14 |
| JBTPR-8  | 9 C2v  | Biaugmented trigonal prism J50             |
| BTTPR-8  | 10 C2v | Biaugmented trigonal prism                 |
| JSD-8    | 11 D2d | Snub diphenoid J84                         |
| TT-8     | 12 Td  | Triakis tetrahedron                        |
| ETBPY-8  | 13 D3h | Elongated trigonal bipyramid               |

| Structure[ML8] | OP-8   | HPY-8  | HBPY-8 | CU-8  | SAPR-8       | TDD-8 | JGBF-8 | JETBPY-8 | JBTPR-8 | BTTPR-8 | JSD-8 | TT-8  | ETBPY-8 |
|----------------|--------|--------|--------|-------|--------------|-------|--------|----------|---------|---------|-------|-------|---------|
| ABOXIY         | 28.334 | 22.496 | 14.451 | 8.199 | <b>0.890</b> | 1.459 | 15.207 | 28.148   | 2.798   | 2.266   | 4.544 | 8.855 | 23.459  |

**Table S3.** Continuous Shape Measures calculation for the Dy2 atom in *R-1*.  
Dy structures

|          |        |                                            |
|----------|--------|--------------------------------------------|
| OP-8     | 1 D8h  | Octagon                                    |
| HPY-8    | 2 C7v  | Heptagonal pyramid                         |
| HBPY-8   | 3 D6h  | Hexagonal bipyramid                        |
| CU-8     | 4 Oh   | Cube                                       |
| SAPR-8   | 5 D4d  | Square antiprism                           |
| TDD-8    | 6 D2d  | Triangular dodecahedron                    |
| JGBF-8   | 7 D2d  | Johnson gyrobifastigium J26                |
| JETBPY-8 | 8 D3h  | Johnson elongated triangular bipyramid J14 |
| JBTPR-8  | 9 C2v  | Biaugmented trigonal prism J50             |
| BTPR-8   | 10 C2v | Biaugmented trigonal prism                 |
| JSD-8    | 11 D2d | Snub diphenoid J84                         |
| TT-8     | 12 Td  | Triakis tetrahedron                        |
| ETBPY-8  | 13 D3h | Elongated trigonal bipyramid               |

| Structure[ML8] | OP-8   | HPY-8  | HBPY-8 | CU-8  | SAPR-8       | TDD-8 | JGBF-8 | JETBPY-8 | JBTPR-8 | BTPR-8 | JSD-8 | TT-8  | ETBPY-8 |
|----------------|--------|--------|--------|-------|--------------|-------|--------|----------|---------|--------|-------|-------|---------|
| ABOXY          | 27.763 | 22.587 | 15.183 | 8.774 | <b>0.672</b> | 1.675 | 15.663 | 27.789   | 2.844   | 2.045  | 4.596 | 9.464 | 23.494  |

**Table S4.** Continuous Shape Measures calculation for the Dy3 atom in *R-1*.  
Dy structures

|          |        |                                            |
|----------|--------|--------------------------------------------|
| OP-8     | 1 D8h  | Octagon                                    |
| HPY-8    | 2 C7v  | Heptagonal pyramid                         |
| HBPY-8   | 3 D6h  | Hexagonal bipyramid                        |
| CU-8     | 4 Oh   | Cube                                       |
| SAPR-8   | 5 D4d  | Square antiprism                           |
| TDD-8    | 6 D2d  | Triangular dodecahedron                    |
| JGBF-8   | 7 D2d  | Johnson gyrobifastigium J26                |
| JETBPY-8 | 8 D3h  | Johnson elongated triangular bipyramid J14 |
| JBTPR-8  | 9 C2v  | Biaugmented trigonal prism J50             |
| BTPR-8   | 10 C2v | Biaugmented trigonal prism                 |
| JSD-8    | 11 D2d | Snub diphenoid J84                         |
| TT-8     | 12 Td  | Triakis tetrahedron                        |
| ETBPY-8  | 13 D3h | Elongated trigonal bipyramid               |

| Structure[ML8] | OP-8   | HPY-8  | HBPY-8 | CU-8  | SAPR-8       | TDD-8 | JGBF-8 | JETBPY-8 | JBTPR-8 | BTPR-8 | JSD-8 | TT-8  | ETBPY-8 |
|----------------|--------|--------|--------|-------|--------------|-------|--------|----------|---------|--------|-------|-------|---------|
| ABOXY          | 27.730 | 22.771 | 15.366 | 8.842 | <b>0.606</b> | 1.931 | 15.757 | 27.768   | 2.916   | 2.030  | 5.041 | 9.472 | 23.718  |

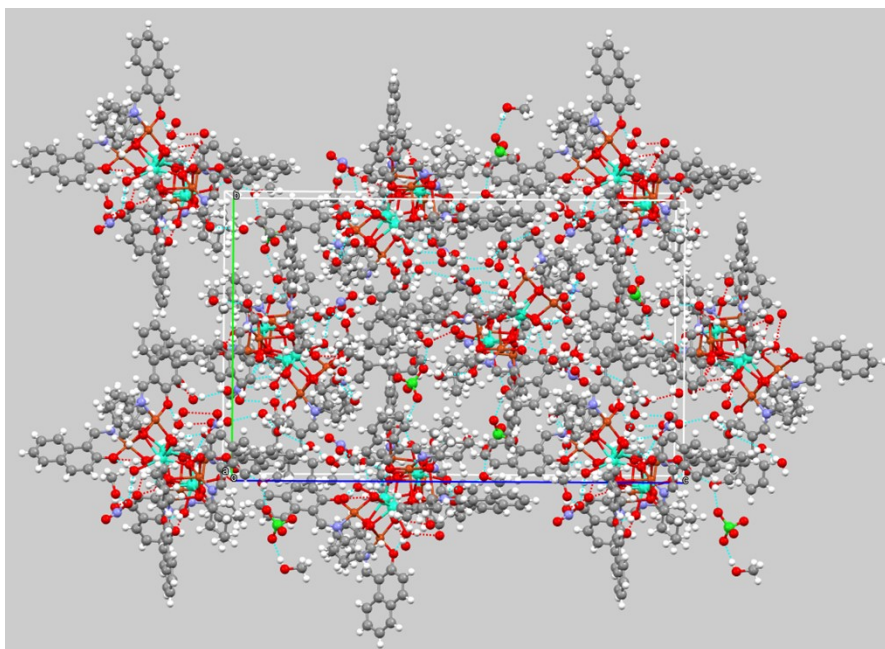

**Fig. S1.** Unit cell diagram of *R-1*.

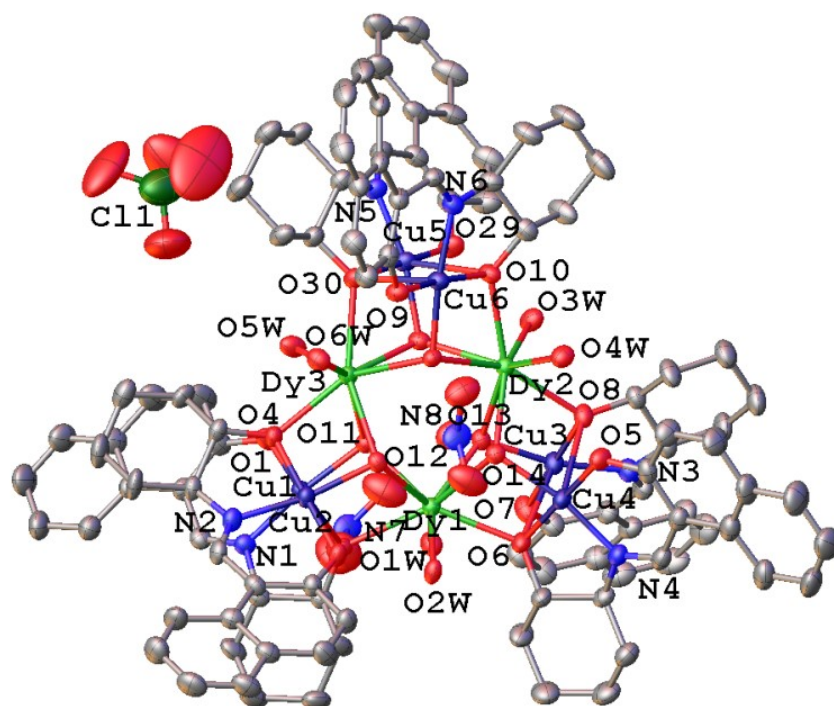

**Fig. S2.** Crystal structure of *S-1*, all H atoms and solvent molecules are omitted for clarity.

**Table S5.** Continuous Shape Measures calculation for the Dy1 atom in *S-1*.  
Dy structures

|          |        |                                            |
|----------|--------|--------------------------------------------|
| OP-8     | 1 D8h  | Octagon                                    |
| HPY-8    | 2 C7v  | Heptagonal pyramid                         |
| HBPY-8   | 3 D6h  | Hexagonal bipyramid                        |
| CU-8     | 4 Oh   | Cube                                       |
| SAPR-8   | 5 D4d  | Square antiprism                           |
| TDD-8    | 6 D2d  | Triangular dodecahedron                    |
| JGBF-8   | 7 D2d  | Johnson gyrobifastigium J26                |
| JETBPY-8 | 8 D3h  | Johnson elongated triangular bipyramid J14 |
| JBTPR-8  | 9 C2v  | Biaugmented trigonal prism J50             |
| BTPR-8   | 10 C2v | Biaugmented trigonal prism                 |
| JSD-8    | 11 D2d | Snub diphenoid J84                         |
| TT-8     | 12 Td  | Triakis tetrahedron                        |
| ETBPY-8  | 13 D3h | Elongated trigonal bipyramid               |

| Structure[ML8] | OP-8   | HPY-8  | HBPY-8 | CU-8  | SAPR-8       | TDD-8 | JGBF-8 | JETBPY-8 | JBTPR-8 | BTPR-8 | JSD-8 | TT-8  | ETBPY-8 |
|----------------|--------|--------|--------|-------|--------------|-------|--------|----------|---------|--------|-------|-------|---------|
| ABOXIY         | 28.345 | 22.521 | 14.490 | 8.125 | <b>0.859</b> | 1.446 | 15.400 | 28.136   | 2.857   | 2.230  | 4.551 | 8.781 | 23.500  |

**Table S6.** Continuous Shape Measures calculation for the Dy2 atom in *S-1*.  
Dy structures

|          |        |                                            |
|----------|--------|--------------------------------------------|
| OP-8     | 1 D8h  | Octagon                                    |
| HPY-8    | 2 C7v  | Heptagonal pyramid                         |
| HBPY-8   | 3 D6h  | Hexagonal bipyramid                        |
| CU-8     | 4 Oh   | Cube                                       |
| SAPR-8   | 5 D4d  | Square antiprism                           |
| TDD-8    | 6 D2d  | Triangular dodecahedron                    |
| JGBF-8   | 7 D2d  | Johnson gyrobifastigium J26                |
| JETBPY-8 | 8 D3h  | Johnson elongated triangular bipyramid J14 |
| JBTPR-8  | 9 C2v  | Biaugmented trigonal prism J50             |
| BTPR-8   | 10 C2v | Biaugmented trigonal prism                 |
| JSD-8    | 11 D2d | Snub diphenoid J84                         |
| TT-8     | 12 Td  | Triakis tetrahedron                        |
| ETBPY-8  | 13 D3h | Elongated trigonal bipyramid               |

| Structure[ML8] | OP-8   | HPY-8  | HBPY-8 | CU-8  | SAPR-8       | TDD-8 | JGBF-8 | JETBPY-8 | JBTPR-8 | BTPR-8 | JSD-8 | TT-8  | ETBPY-8 |
|----------------|--------|--------|--------|-------|--------------|-------|--------|----------|---------|--------|-------|-------|---------|
| ABOXIY         | 28.004 | 22.479 | 15.007 | 8.592 | <b>0.713</b> | 1.610 | 15.593 | 27.935   | 2.863   | 2.093  | 4.613 | 9.249 | 23.524  |

**Table S7.** Continuous Shape Measures calculation for the Dy<sub>3</sub> atom in *S-1*.  
Dy structures

|          |        |                                            |
|----------|--------|--------------------------------------------|
| OP-8     | 1 D8h  | Octagon                                    |
| HPY-8    | 2 C7v  | Heptagonal pyramid                         |
| HBPY-8   | 3 D6h  | Hexagonal bipyramid                        |
| CU-8     | 4 Oh   | Cube                                       |
| SAPR-8   | 5 D4d  | Square antiprism                           |
| TDD-8    | 6 D2d  | Triangular dodecahedron                    |
| JGBF-8   | 7 D2d  | Johnson gyrobifastigium J26                |
| JETBPY-8 | 8 D3h  | Johnson elongated triangular bipyramid J14 |
| JBTPR-8  | 9 C2v  | Biaugmented trigonal prism J50             |
| BTPR-8   | 10 C2v | Biaugmented trigonal prism                 |
| JSD-8    | 11 D2d | Snub diphenoid J84                         |
| TT-8     | 12 Td  | Triakis tetrahedron                        |
| ETBPY-8  | 13 D3h | Elongated trigonal bipyramid               |

| Structure[ML8] | OP-8   | HPY-8  | HBPY-8 | CU-8  | SAPR-8       | TDD-8 | JGBF-8 | JETBPY-8 | JBTPR-8 | BTPR-8 | JSD-8 | TT-8  | ETBPY-8 |
|----------------|--------|--------|--------|-------|--------------|-------|--------|----------|---------|--------|-------|-------|---------|
| ABOXIY         | 27.629 | 22.851 | 15.438 | 8.836 | <b>0.569</b> | 2.030 | 15.763 | 27.903   | 2.831   | 1.942  | 5.184 | 9.451 | 23.617  |

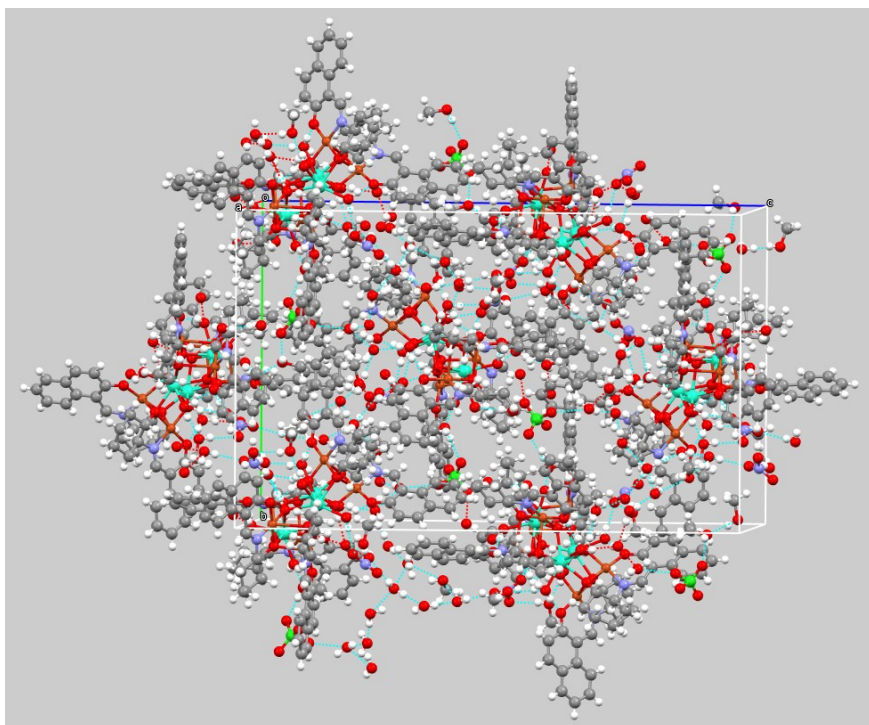

**Fig. S3.** Unit cell diagram of *S-1*.



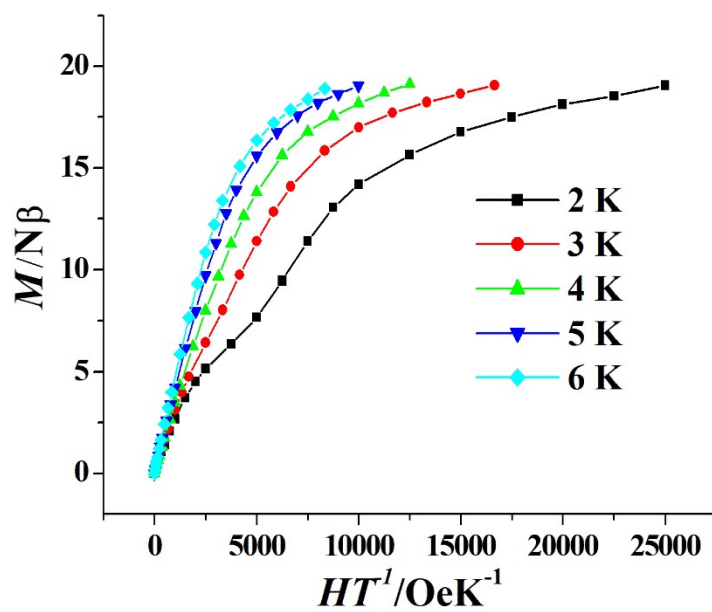

Fig. S4.  $M$  versus  $H/T$  plots at 2-6 K of R-1.

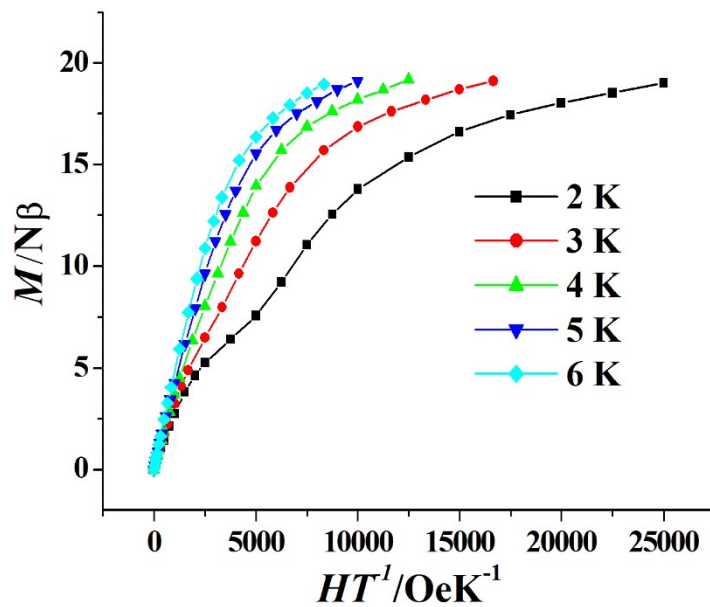

Fig. S5.  $M$  versus  $H/T$  plots at 2-6 K of S-1.

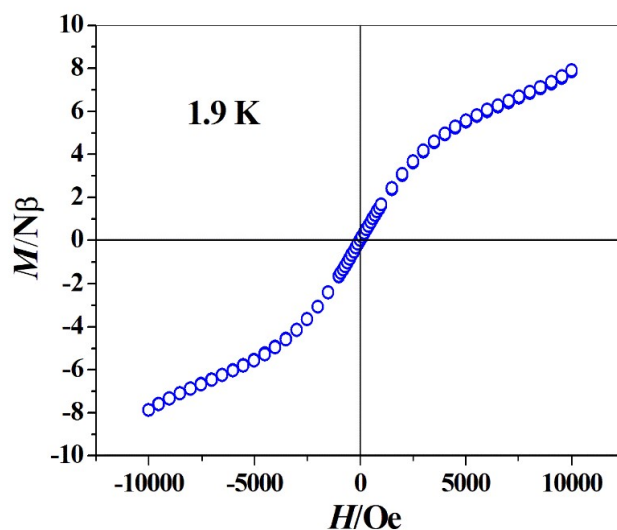

**Fig. S6.** Hysteresis loop for *R-1* at 1.9 K with the normal sweep rate (100-300 Oe  $\text{min}^{-1}$ ).

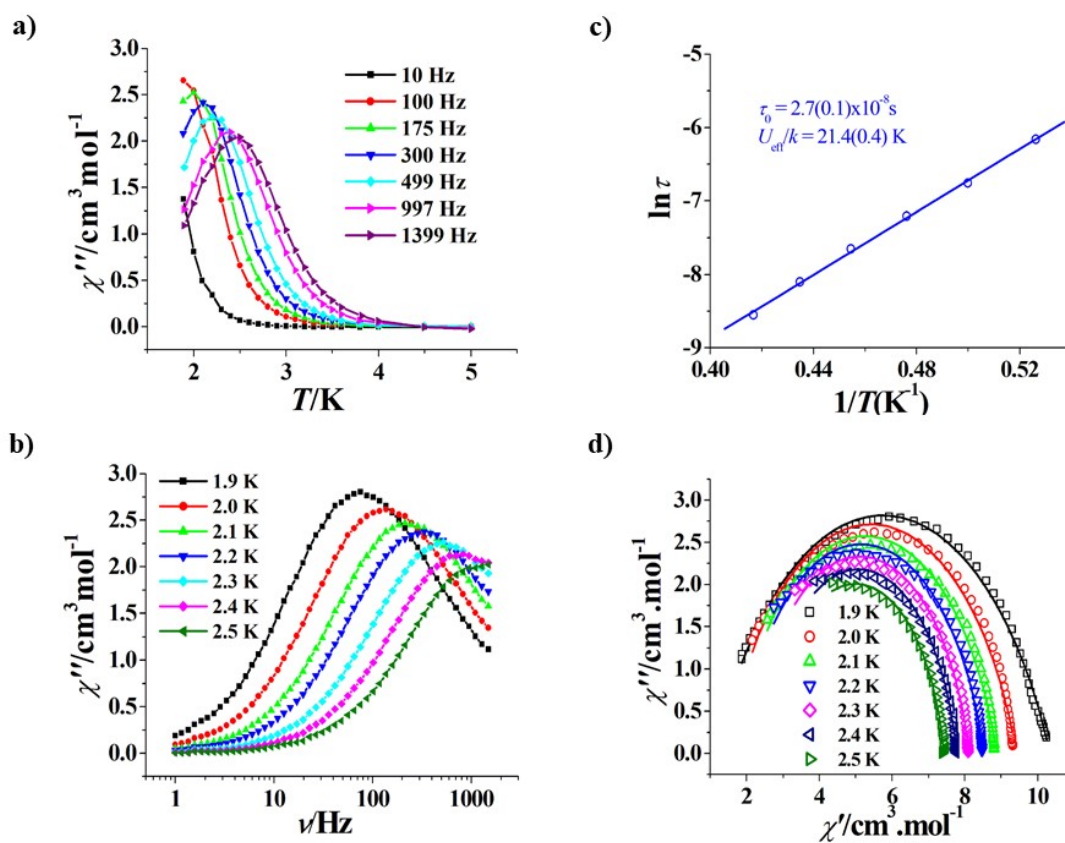

**Fig. S7.** Plots of  $\chi''$  versus  $T$  for *S-1* ( $H_{\text{dc}} = 0$  Oe) (a). Frequency dependence of  $\chi''$  for *S-1* at zero dc field (b). Plot of  $-\ln(\tau)$  versus  $1/T$  for *S-1* ( $H_{\text{dc}} = 0$  Oe), the solid line represents the best fitting with Arrhenius law (c). Cole-Cole plots measured from 1.9 to 2.5 K for *S-1* ( $H_{\text{dc}} = 0$  Oe), the solid lines represent the best fitting with the generalized Debye model (d).

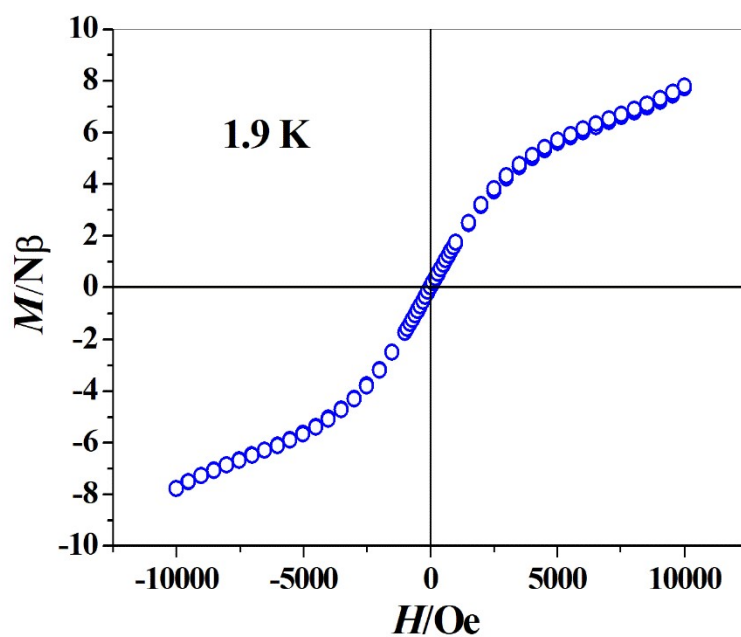

Fig. S8. Hysteresis loop for *S-1* at 1.9 K with the normal sweep rate (100-300 Oe min<sup>-1</sup>).

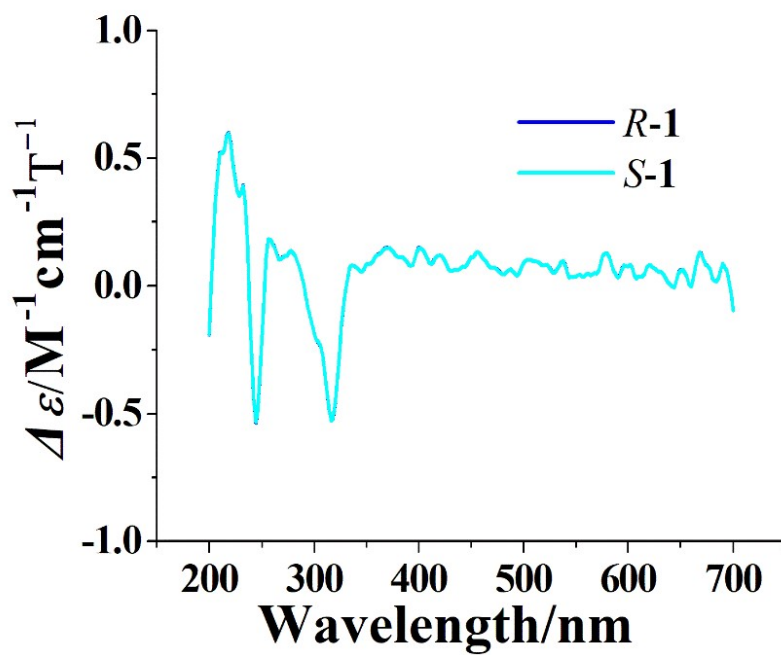

Fig. S9. MCD spectra of *R-1* and *S-1*.

**Table S8.** The proton conductivity of *R-1* at 25 °C under variable relative humidity (RH).

| RH / % | $\sigma / \text{S cm}^{-1}$ |
|--------|-----------------------------|
| 60     | $6.85 \times 10^{-8}$       |
| 70     | $1.87 \times 10^{-7}$       |
| 80     | $3.97 \times 10^{-7}$       |
| 90     | $7.28 \times 10^{-7}$       |
| 100    | $9.55 \times 10^{-7}$       |

**Table S9.** The proton conductivity of *R-1* at 100 % relative humidity (RH) under variable temperature (°C).

| Temperature / °C | $\sigma / \text{S cm}^{-1}$ |
|------------------|-----------------------------|
| 25               | $9.55 \times 10^{-7}$       |
| 35               | $1.49 \times 10^{-6}$       |
| 45               | $1.99 \times 10^{-6}$       |
| 55               | $2.74 \times 10^{-6}$       |
| 65               | $3.34 \times 10^{-6}$       |
| 80               | $4.77 \times 10^{-6}$       |

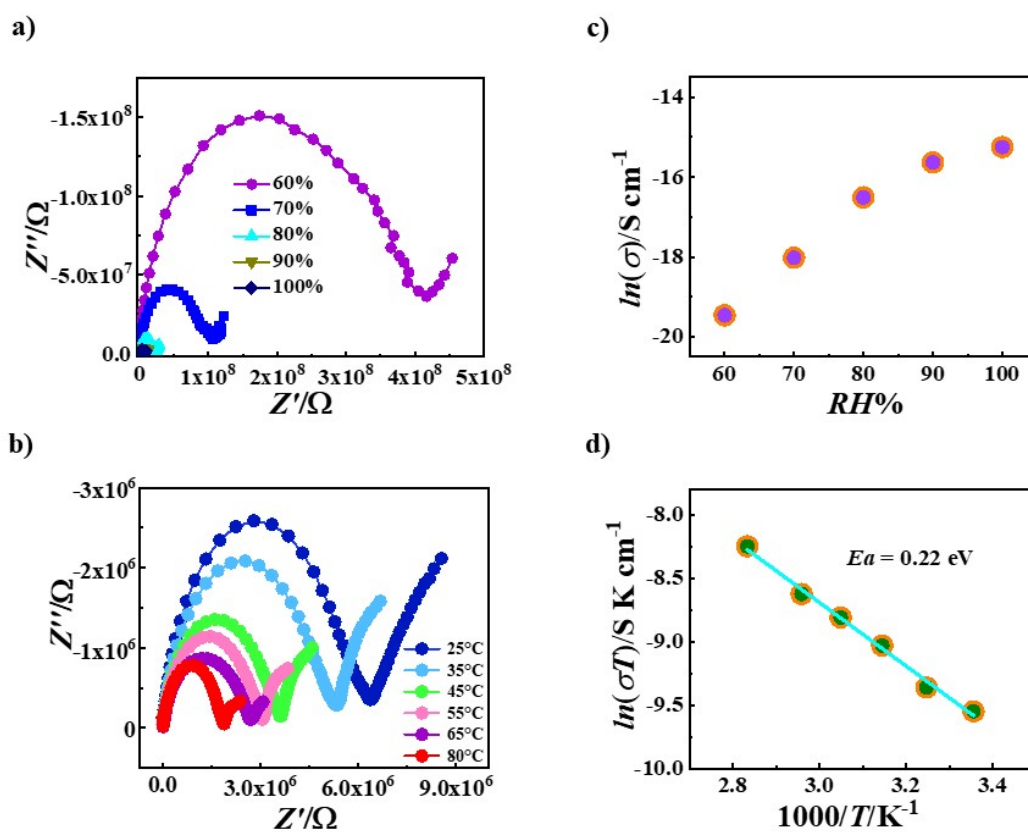

**Fig. S10.** Nyquist plots for S-1 at 25 °C under different relative humidity (RH) levels (a). Nyquist plots for S-1 at different temperatures under 100% relative humidity (RH) (b). Plots of proton conductivity for S-1 vs RH at 25 °C (c). Plots of  $\ln(\sigma T)$  vs  $1000/T$  for S-1 under 100% relative humidity (RH) (d).

**Table S10.** The proton conductivity of *S-1* at 25 °C under variable relative humidity (RH).

| RH / % | $\sigma / \text{S cm}^{-1}$ |
|--------|-----------------------------|
| 60     | $3.54 \times 10^{-9}$       |
| 70     | $1.49 \times 10^{-8}$       |
| 80     | $6.78 \times 10^{-8}$       |
| 90     | $1.62 \times 10^{-7}$       |
| 100    | $2.40 \times 10^{-7}$       |

**Table S11.** The proton conductivity of *S-1* at 100 % relative humidity (RH) under variable temperature (°C).

| Temperature / °C | $\sigma / \text{S cm}^{-1}$ |
|------------------|-----------------------------|
| 25               | $2.40 \times 10^{-7}$       |
| 35               | $2.78 \times 10^{-7}$       |
| 45               | $3.77 \times 10^{-7}$       |
| 55               | $4.57 \times 10^{-7}$       |
| 65               | $5.33 \times 10^{-7}$       |
| 80               | $7.45 \times 10^{-7}$       |
